# Supplementary material
Source: publisher figshare collection journal article supplement (https://acs.figshare.com/ndownloader/files/15073037)
Supplement: Supplementary file 1 [file 15073037]

## Appendix

### 1. Fault tree Calculations (for t=420s)

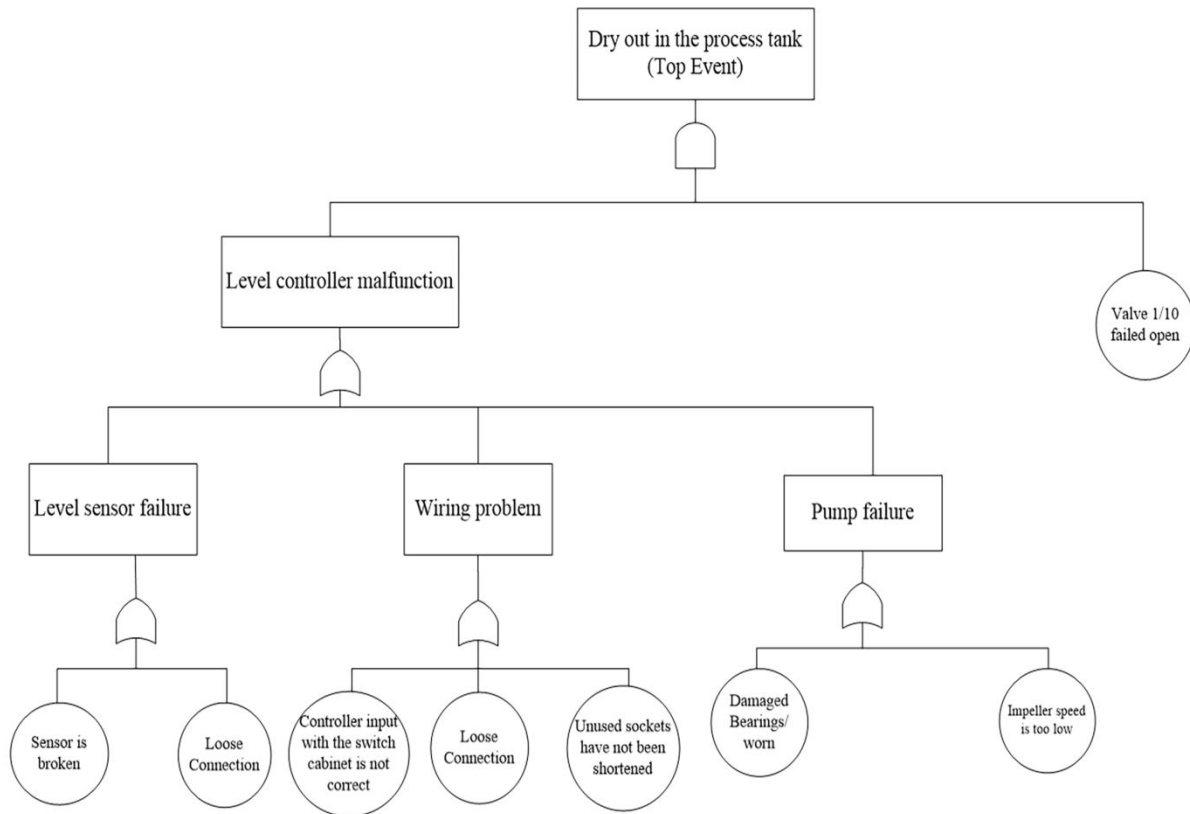

Figure A: Fault tree

### **Analysis**

Table A shows the failure rates of the basic events used in the fault tree (Figure A) and dynamic fault tree (Figure B) and their corresponding probability for 420s.

Table A: Calculations of Probability of Basic Events for Static Fault Tree <sup>27</sup>

| Events                                                                 | failure rates<br>(failure/s) | Probability, P<br>t=420s |
|------------------------------------------------------------------------|------------------------------|--------------------------|
| Controller input with switch cabinet is not correct (BE <sub>1</sub> ) | $6.33 \times 10^{-12}$       | $2.66 \times 10^{-9}$    |
| Loose Connection (BE <sub>2</sub> )                                    | $2.00 \times 10^{-10}$       | $8.40 \times 10^{-8}$    |
| Unused Sockets have not been shorted (BE <sub>3</sub> )                | $6.33 \times 10^{-13}$       | $2.66 \times 10^{-10}$   |
| Sensor is broken (BE <sub>4</sub> )                                    | $9.11 \times 10^{-9}$        | $3.83 \times 10^{-6}$    |
| Damaged bearings/ worn (BE <sub>5</sub> )                              | $8.00 \times 10^{-16}$       | $3.36 \times 10^{-13}$   |
| Impeller speed is too high (BE <sub>6</sub> )                          | $2.00 \times 10^{-9}$        | $8.40 \times 10^{-7}$    |
| Valve failed open (BE <sub>7</sub> )                                   | $8.25 \times 10^{-9}$        | $3.46 \times 10^{-6}$    |

### Sample Calculations

A sample calculation for an intermediate event (Level sensor failure) is shown here:

$$\begin{aligned}
 \text{➤ } P(\text{Level Sensor failure}) &= P(\text{BE}_4 \cup \text{BE}_2) \\
 &= P(\text{BE}_4) + P(\text{BE}_2) - P(\text{BE}_4 \cap \text{BE}_2) \\
 &= (3.83 \times 10^{-6} + 8.40 \times 10^{-8}) - (3.83 \times 10^{-6} \times 8.40 \times 10^{-8})
 \end{aligned}$$

So,  $P(\text{Level Sensor failure}) = 3.91 \times 10^{-6}$

Table B represents the intermediate events and top event probabilities for fault tree.

Table B: Calculated probabilities of intermediate events and top event from fault tree

| Events                                  | Probability, P<br>t=420s |
|-----------------------------------------|--------------------------|
| Wiring Problem                          | $8.69 \times 10^{-08}$   |
| Level Sensor Failure                    | $3.91 \times 10^{-06}$   |
| Pump P1 failure                         | $8.4 \times 10^{-07}$    |
| Level Controller Malfunction            | $4.83 \times 10^{-06}$   |
| Valve Failed Open                       | $3.46 \times 10^{-06}$   |
| Dry out in the process tank (Top event) | $1.67 \times 10^{-11}$   |

- For Specific Case: “Sensor is Broken”

#### Fault Tree Result:

$P(\text{Sensor is broken}) = 1$  [as it is already broken]

So,  $P(\text{Level sensor failure}) = P(\text{Level controller malfunction}) = 1$

$P(\text{valve failed open}) = 3.46 \times 10^{-06}$

So,  $P(\text{Dry out in the Process tank}) = 1 \times (3.46 \times 10^{-06}) = 3.46 \times 10^{-06} (3.46 \times 10^{-04} \%)$

## 2. Dynamic Fault Tree Calculations (for t=420s)

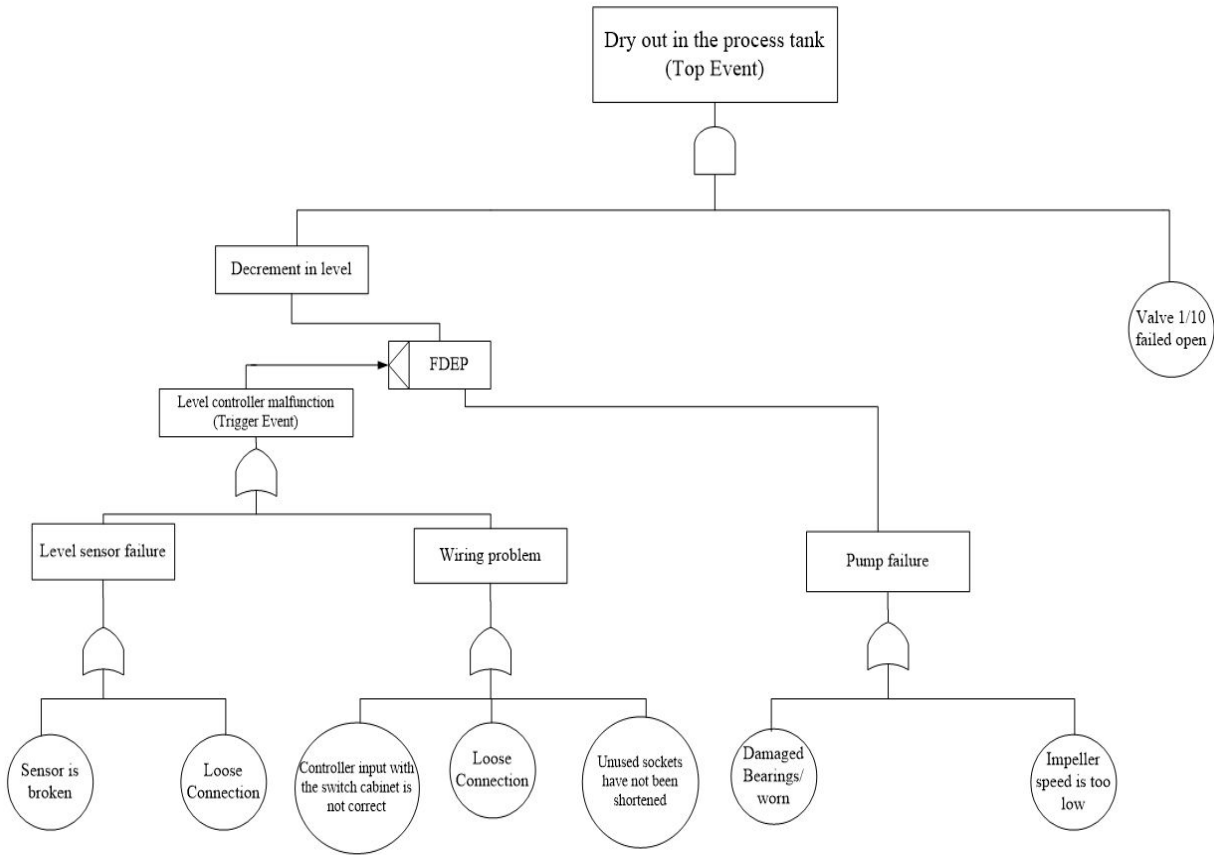

Figure B: Dynamic Fault tree

### Sample Calculations

Sample calculations for Pump Failure and Decrement in level using Markov Chain are shown here:

➤ Probability of pump failure (using Markov Chain):

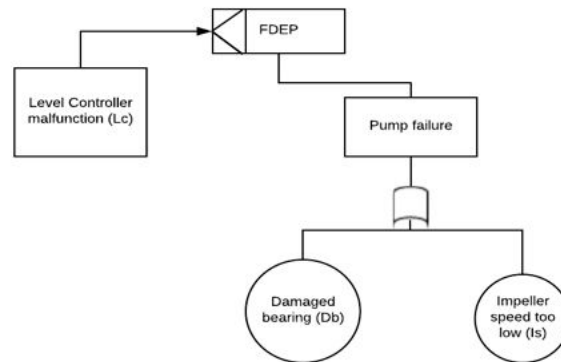

State diagram for Pump failure (P):

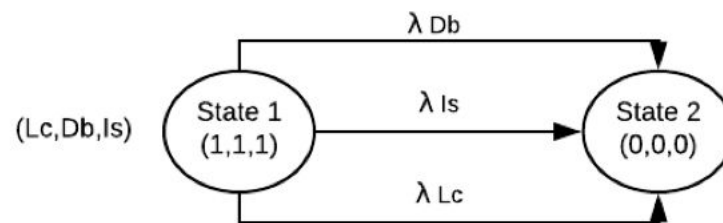

Now state1 probability P1,

$$\frac{dP1}{dt} = - (\lambda Lc + \lambda Db + \lambda Is)P1$$

$$So, \frac{dP1}{P1} = - (\lambda Lc + \lambda Db + \lambda Is)dt \dots \dots \dots (i)$$

Integrating equation (i),

$$\ln(P1) = - (\lambda Lc + \lambda Db + \lambda Is)t + C \text{ [ at } t=0, P1=1 \text{ so } C=0]$$

$$P1 = e^{-(\lambda_{Lc} + \lambda_{Db} + \lambda_{Is})t} = 999.994 \times 10^{-3}$$

So, State 2 probability,  $P2 = 1 - P1 = 5.67 \times 10^{-6}$

The probability of Pump failure,  $P_p = 5.67 \times 10^{-6}$  ( $\lambda_p = 1.35 \times 10^{-8}$ )

➤ Probability of 'Decrement in level' (using Markov Chain):

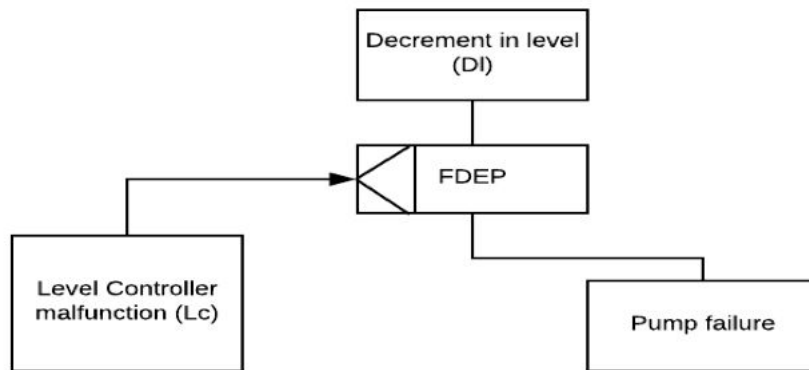

The state diagram for the gate is:

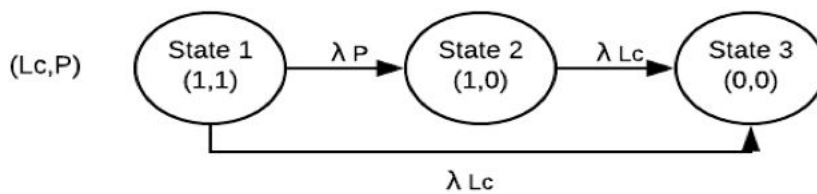

Now, State 1 probability,  $P1$

$$\frac{dP1}{dt} = -(\lambda_{Lc} + \lambda_p)P1 \dots\dots (ii)$$

$$\ln(P1) = -(\lambda_{Lc} + \lambda_p)t \quad [\text{integrating equation (ii)}]$$

$$P1 = e^{-(\lambda_{Lc} + \lambda_p)t} = 999.989 \times 10^{-3}$$

State 2 Probability, P2

$$\frac{dP2}{dt} = \lambda_p \times P1 - \lambda_{Lc} \times P2$$

$$\frac{dP2}{dt} + \lambda_{Lc} \times P2 = \lambda_p \times P1$$

Integrating factor=  $e^{\lambda_{Lc} \times t}$

$$e^{\lambda_{Lc} \times t} \left[ \frac{dP2}{dt} + \lambda_{Lc} \times P2 \right] = e^{\lambda_{Lc} \times t} [\lambda_p \times P1] = e^{\lambda_{Lc} \times t} [\lambda_p \times e^{-(\lambda_{Lc} + \lambda_p)t}] \quad \dots\dots\dots (iii)$$

Integrating equation (iii),

$$e^{\lambda_{Lc} \times t} P2 = -e^{-\lambda_p \times t} + C$$

$$P2 = -e^{-(\lambda_p + \lambda_{Lc}) \times t} + C e^{-\lambda_{Lc} \times t}$$

$$P2 = -e^{-(\lambda_{Lc} + \lambda_p) \times t} + e^{-\lambda_{Lc} \times t} \quad [\text{at } t=0, P2=0 \text{ so, } C=1]$$

$$P2 = 6.1 \times 10^{-6}$$

So, State 3 probability,  $P3 = 1 - P1 - P2 = 4.8 \times 10^{-6}$

So, the probability of Decrement in level,  $P_{DI} = 4.8 \times 10^{-6}$

The calculated probabilities for the intermediate events and top event are represented in table C.

Table C: Calculated Probabilities of the intermediate events and top events from DFT

| Events                                  | Probability, P<br>t=420s |
|-----------------------------------------|--------------------------|
| Wiring Problem                          | $8.69 \times 10^{-08}$   |
| Level Sensor Failure                    | $3.91 \times 10^{-06}$   |
| Level Controller Malfunction            | $4.83 \times 10^{-06}$   |
| Pump Failure                            | $5.67 \times 10^{-06}$   |
| Decrement in Level                      | $4.8 \times 10^{-06}$    |
| Valve Failed Open                       | $3.46 \times 10^{-06}$   |
| Dry out in the Process Tank (Top Event) | $1.66 \times 10^{-11}$   |

For Specific Case: “Sensor is Broken”

#### Dynamic Fault Tree:

$P(\text{Sensor is broken}) = 1$  [as it is already broken]

$P(\text{Level sensor failure}) = P(\text{level controller malfunction}) = P(\text{Pump failure}) = 1$

$P(\text{Decrement in level}) = 1$

$P(\text{Valve failed open}) = 3.46 \times 10^{-06}$

$P(\text{Dry out in the process tank}) = 1 \times (3.46 \times 10^{-06}) = 3.46 \times 10^{-06} (3.46 \times 10^{-04} \%)$



3. Table D shows the calculated dry out probabilities from the cumulative distribution graphs (figure 8 and figure 9)

Table D: Probabilities of flow rate and level less than the assumed threshold from CDFs

| Experimental data sets | Flow rate probability less than 100 l/h | Level probability less than 10% in the tank |
|------------------------|-----------------------------------------|---------------------------------------------|
| T1 (0 to 420s)         | 0.13                                    | 0.07                                        |
| T2 (0 to 720s)         | 0.15                                    | 0.11                                        |
| T3 (0 to 1020s)        | 0.17                                    | 0.15                                        |
| T4 (0 to 1320s)        | 0.21                                    | 0.20                                        |

#### 4. Cumulative Gain Chart Construction:

The construction of cumulative gain charts for the experimental data sets is described here. First, for fault tree, the assumption for dry out is flow rate of water less than 100 l/h. So, data which falls into this category is given the probability of 1 and data which does not fall into this category is given the probability of 0. Then after ranking, the data set was categorized into ten groups (deciles). The cumulative positive responses were determined afterwards. For dynamic fault tree, the assumption of dry out is flow rate less than 100 l/h and level in the process tank less than 10%. So, similarly, the data which falls into this class is given the probability of 1 and data which does not fall into this group is given the probability of 0. Ranking the data set and categorizing them into ten groups the cumulative positive responses were determined. Likewise, for Bayesian network assumption, dry out depends 70% on flow rate and 30% on level in the process tank threshold, the ranking and grouping of data set was done. Then cumulative positive responses were determined. The base model is the linear model which considers the same amount of positive responses as the decile of data, meaning, 10% of data will give 10% positive responses, 20% of data will give 20% positive responses and so on. For experimental data set T4, the results are in the following table E:

Table E: Cumulative positive responses for top event (dry out) considering three models for T4 (0-1320s) data set

| Deciles | Cumulative positive responses for FT | Cumulative positive responses for DFT | Cumulative positive responses for BN |
|---------|--------------------------------------|---------------------------------------|--------------------------------------|
| 1       | 28.77%                               | 31.63%                                | 32.55%                               |
| 2       | 57.77%                               | 63.52%                                | 65.35%                               |
| 3       | 86.77%                               | 95.41%                                | 98.16%                               |
| 4       | 100%                                 | 100%                                  | 100%                                 |
| 5       | 100%                                 | 100%                                  | 100%                                 |
| 6       | 100%                                 | 100%                                  | 100%                                 |
| 7       | 100%                                 | 100%                                  | 100%                                 |
| 8       | 100%                                 | 100%                                  | 100%                                 |
| 9       | 100%                                 | 100%                                  | 100%                                 |
| 10      | 100%                                 | 100%                                  | 100%                                 |

Now, putting them in graph provides the following Figure C:

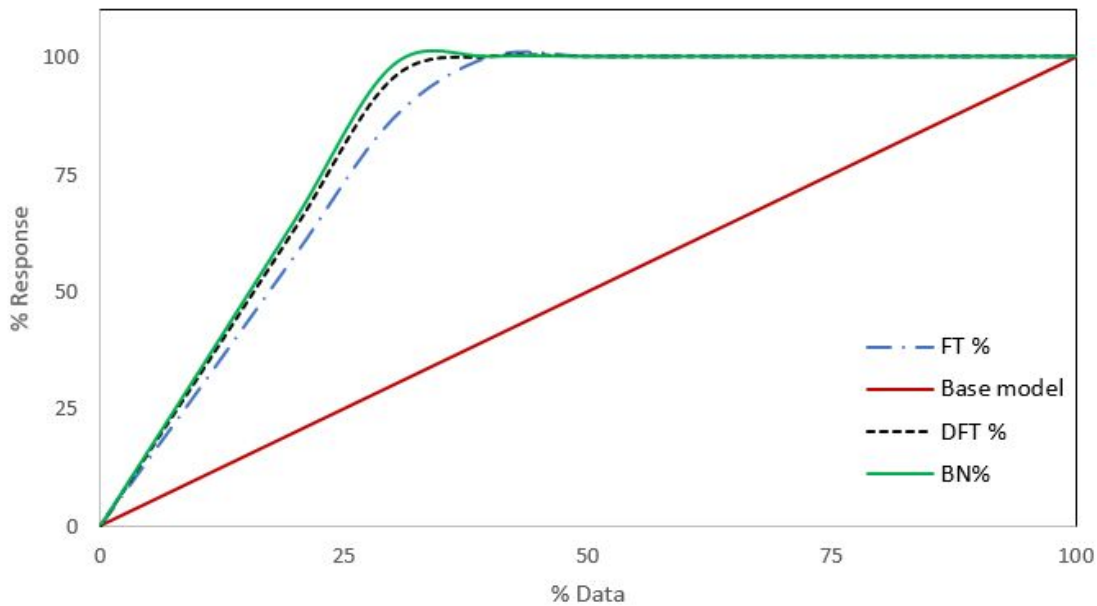

Figure C: Cumulative gain chart for T4 data set

The steeper the model curve is, the better the model is performing. From the graph, we can see that Bayesian network is performing the best among the three models. Dynamic fault tree is performing better than fault tree. Similarly, cumulative gain charts for T1, T2 and T3 data set were constructed.
